# Supplementary material for: Ultra-broadening near-infrared emission of Cr3+-activated pyroxene phosphors via chemical unit substitution and Yb3+ co-doping
Source: Royal Society of Chemistry journal article supplement (doi:10.1039/d3tc03262k), 2023-01-01
Supplement: d3tc03262k1.pdf [file d3tc03262k1.pdf]

# **Ultra-Broadening Near-Infrared Emission of Cr<sup>3+</sup>-Activated Pyroxene Phosphor via Chemical Unit Substitution and Yb<sup>3+</sup> Co-doping**

Shuofeng Sun, Yuming Yang, Renfei Zhang, Qinan Mao\*, Lang Pei,

Junhua Xi, Yang Ding, Yiwen Zhu, Hua Yu, Jiasong Zhong\*

Center for Advanced Optoelectronic Materials & College of Materials and  
Environmental Engineering, Hangzhou Dianzi University, Hangzhou 310018,  
People's Republic of China

\* Corresponding authors:

Qinan Mao, E-mail: maoqinan@hdu.edu.cn

Jiasong Zhong, E-mail: jiasongzhong@hdu.edu.cn

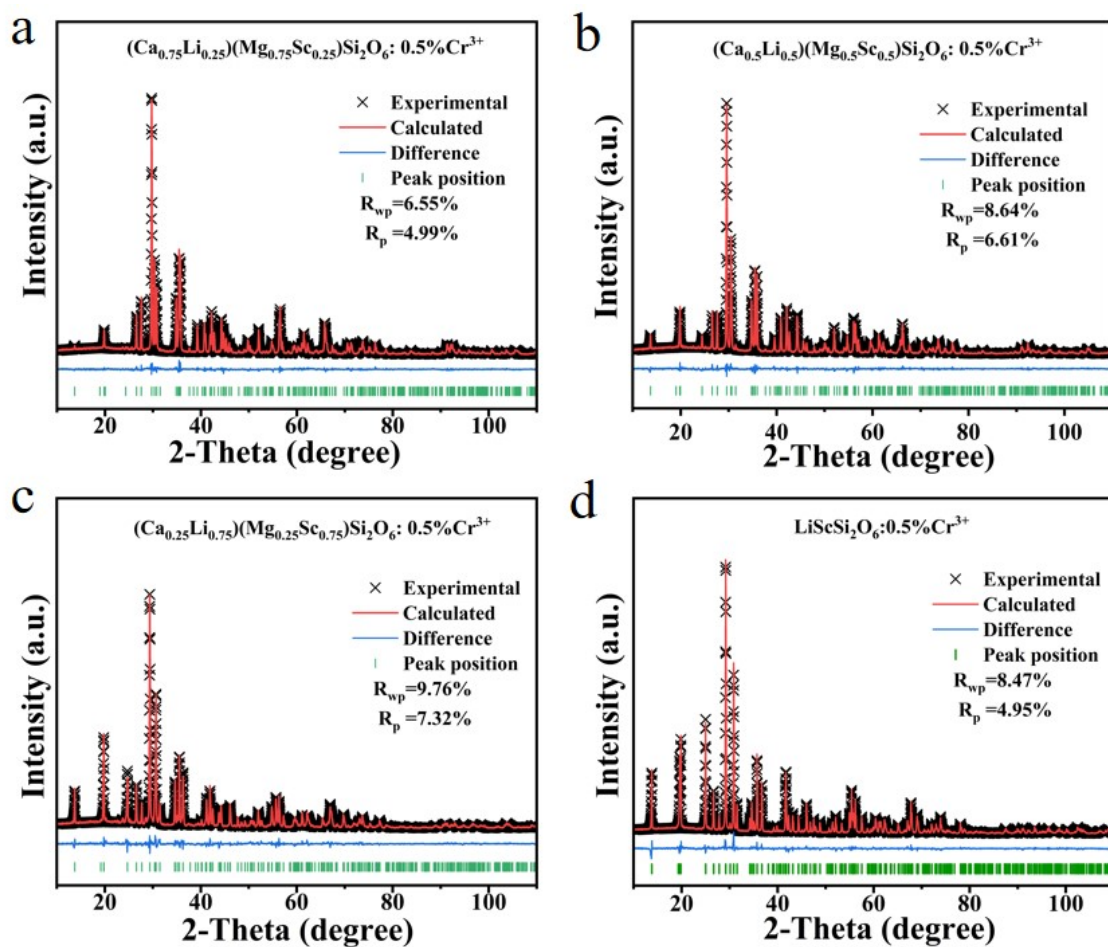

Figure S1. XRD Rietveld refinements of  $(\text{Ca}_{1-x}\text{Li}_x)(\text{Mg}_{1-x}\text{Sc}_x)\text{Si}_2\text{O}_6: 0.5\%\text{Cr}^{3+}$  ( $x=0.25\sim 1$ ) phosphors.

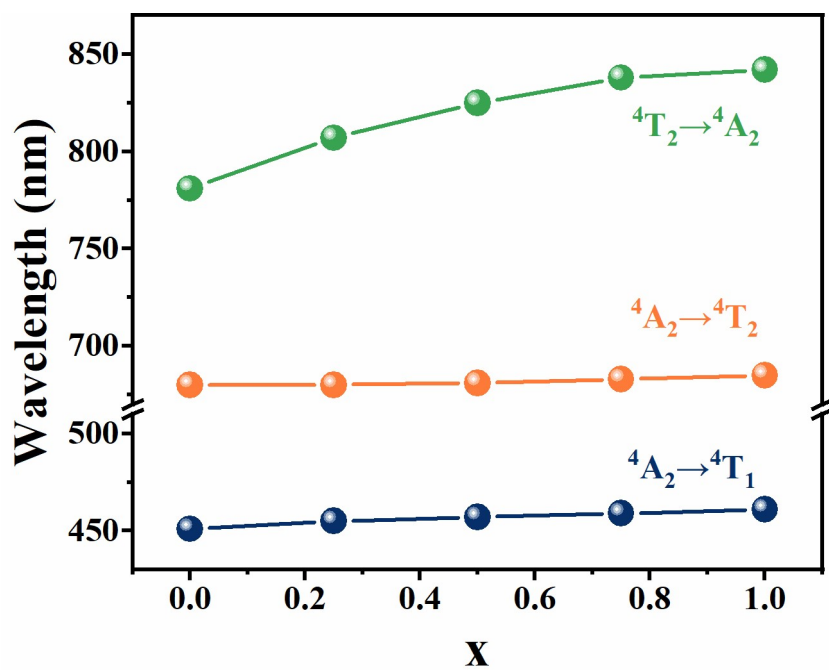

Figure S2. Peak positions of  ${}^4A_2 \rightarrow {}^4T_1$ ,  ${}^4A_2 \rightarrow {}^4T_2$  and  ${}^4T_2 \rightarrow {}^4A_2$  transitions in  $(Ca_{1-x}Li_x)(Mg_{1-x}Sc_x)Si_2O_6:0.5\%Cr^{3+}$  ( $x=0\sim 1$ ) phosphors.

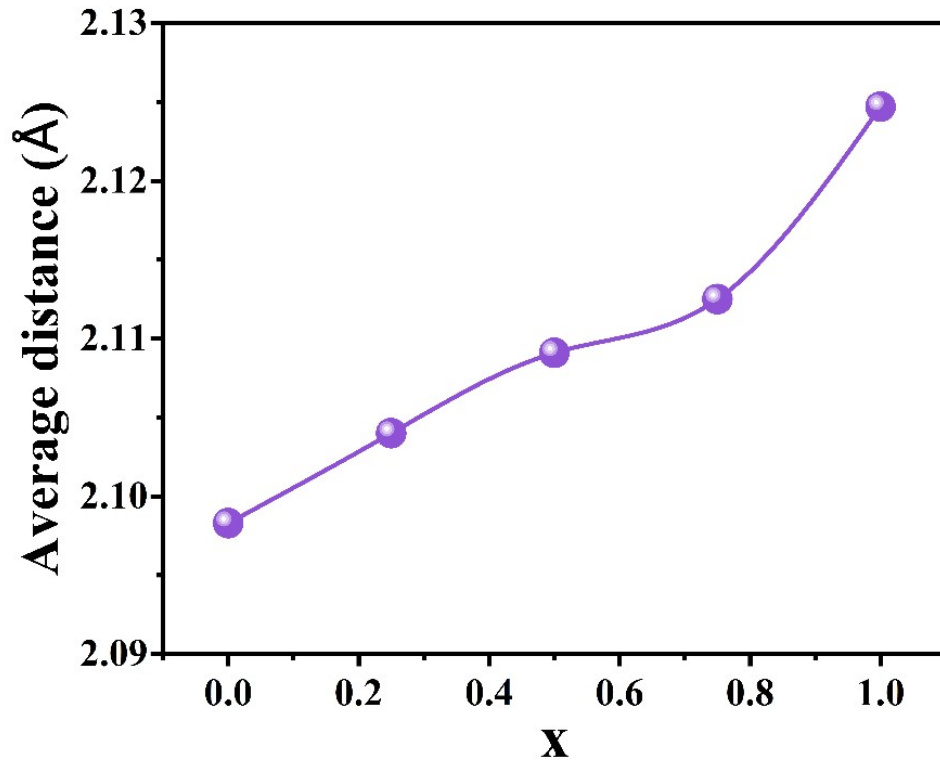

Figure S3. Variation of average bond length of  $\text{Mg}^{2+}/\text{Sc}^{3+}-\text{O}^{2-}$  with  $x$  for  $(\text{Ca}_{1-x}\text{Li}_x)(\text{Mg}_{1-x}\text{Sc}_x)\text{Si}_2\text{O}_6:0.5\%\text{Cr}^{3+}$  ( $x=0\sim 1$ ) phosphors.

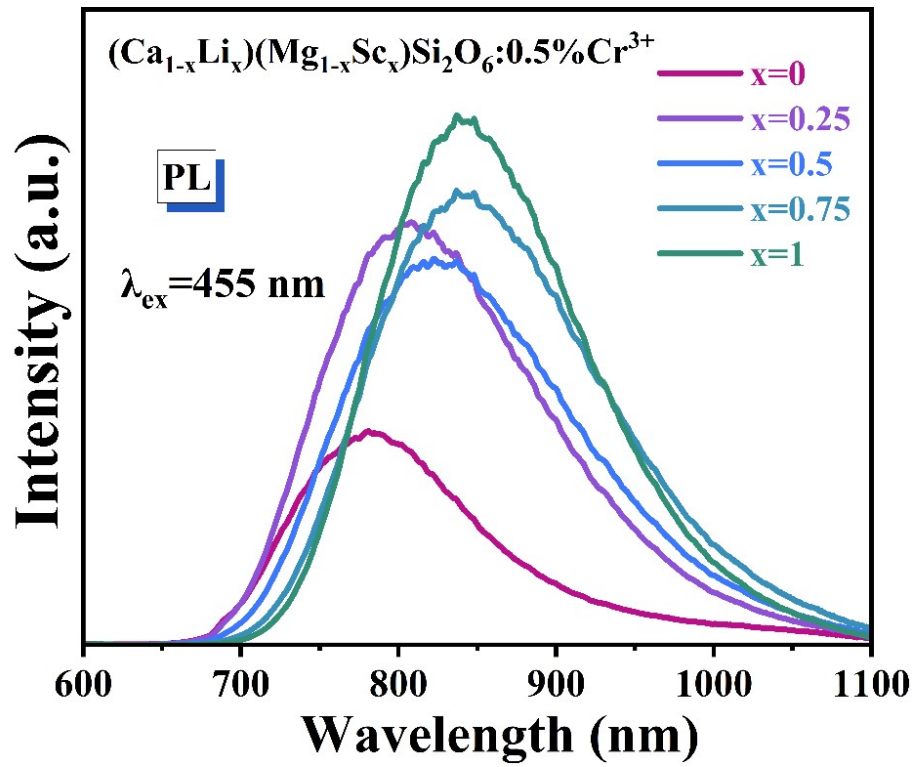

Figure S4. Photoluminescence spectra of  $(\text{Ca}_{1-x}\text{Li}_x)(\text{Mg}_{1-x}\text{Sc}_x)\text{Si}_2\text{O}_6:0.5\%\text{Cr}^{3+}$  ( $x=0\sim 1$ ).

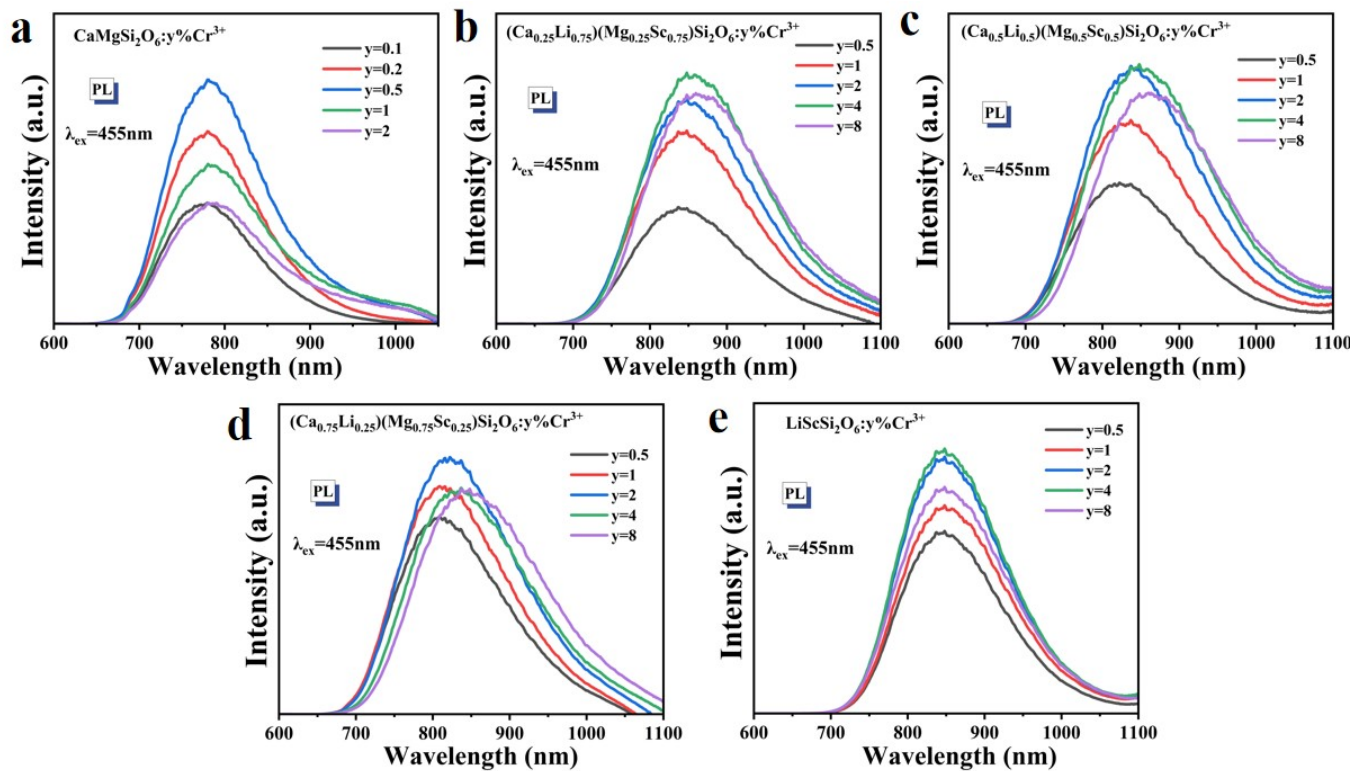

Figure S5. Photoluminescence spectra of  $(\text{Ca}_{1-x}\text{Li}_x)(\text{Mg}_{1-x}\text{Sc}_x)\text{Si}_2\text{O}_6:\text{Cr}^{3+}$  ( $x=0\sim 1$ ) with different  $\text{Cr}^{3+}$  doping concentration.

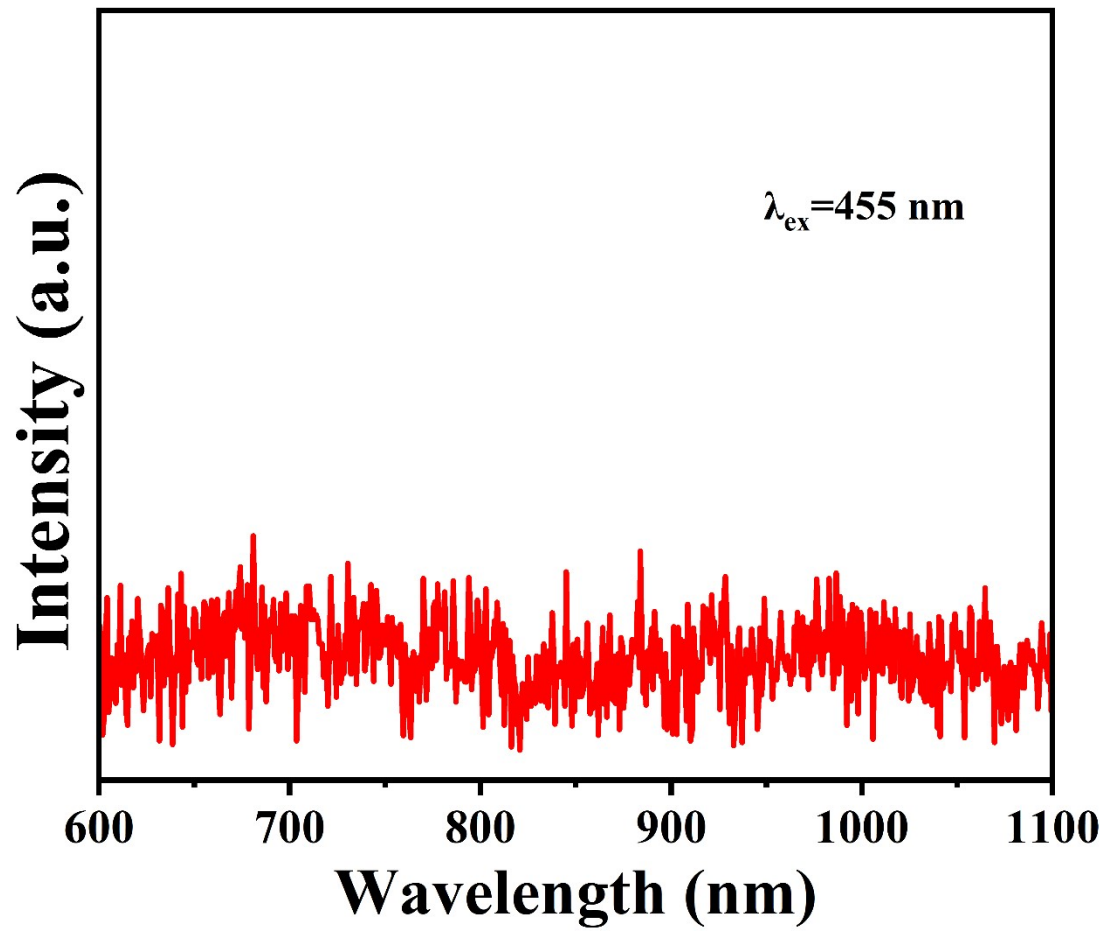

Figure S6. Photoluminescence spectra of  $(\text{Ca}_{0.5}\text{Li}_{0.5})(\text{Mg}_{0.5}\text{Sc}_{0.5})\text{Si}_2\text{O}_6:\text{Yb}^{3+}$  under 455nm excitation.

## Quantum Yield

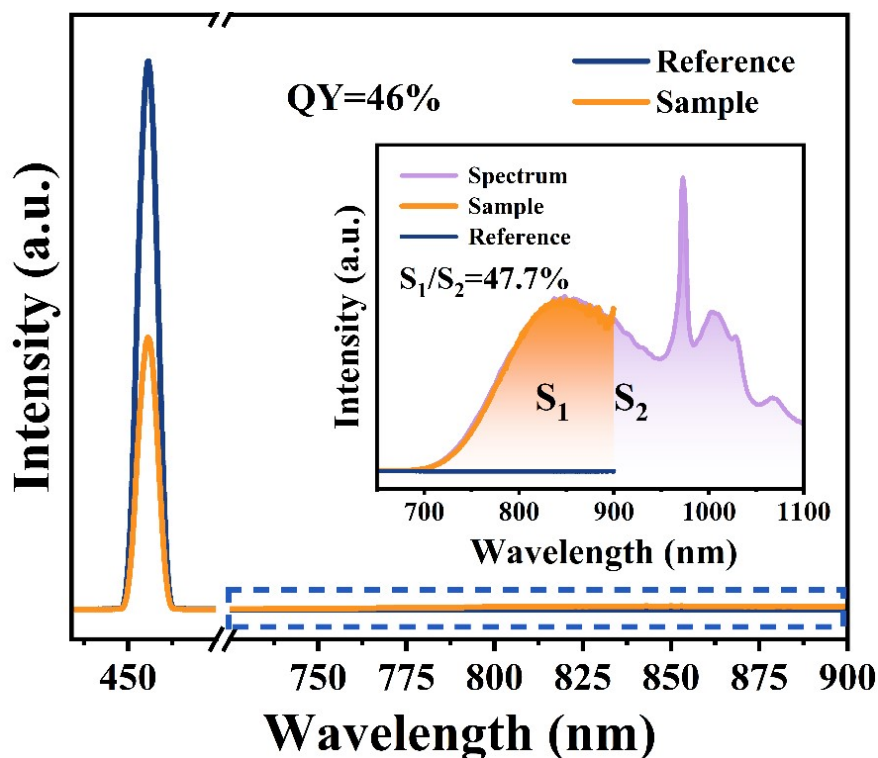

Figure S7. Luminescent spectra for the QY measurement of  $(\text{Ca}_{0.5}\text{Li}_{0.5})(\text{Mg}_{0.5}\text{Sc}_{0.5})\text{Si}_2\text{O}_6:4\%\text{Cr}^{3+},0.4\%\text{Yb}^{3+}$

The value of internal QY is calculated from the following equation <sup>[1]</sup>:

$$QY = \frac{\int L_S - \int L_R}{\int E_R - \int E_S} \times 100\%$$

where  $L_S$  and  $L_R$  are the luminescent spectrum of the sample and the  $\text{BaSO}_4$  reference, respectively;  $E_S$  and  $E_R$  are the excitation light spectra of the sample and the  $\text{BaSO}_4$  reference, respectively. Due to the spectral response of VIS PMT detector, the measurement of QY was recorded spanning from 650nm to 900 nm. As shown in Fig



S6, the calculated QY of emission in orange area ( $S_1$ ) is 21.92%. The area ratio of  $S_1$  (integral area from 650 nm to 900 nm) to  $S_2$  (integral area from 650 nm to 1100 nm) is 47.7%. Therefore, the QY of  $(Ca_{0.5}Li_{0.5})(Mg_{0.5}Sc_{0.5})Si_2O_6:4\%Cr^{3+},0.4\%Yb^{3+}$  phosphor is determined to be above 46%.

Table S1. The detailed refinement results of  $(\text{Ca}_{1-x}\text{Li}_x)(\text{Mg}_{1-x}\text{Sc}_x)\text{Si}_2\text{O}_6:\text{Cr}^{3+}$  ( $x=0\sim 1$ )

phosphors

|                                | <b>x=0</b> | <b>x=0.25</b> | <b>x=0.5</b> | <b>x=0.75</b> | <b>x=1</b> |
|--------------------------------|------------|---------------|--------------|---------------|------------|
| <b>a(Å)</b>                    | 9.7903     | 9.7722        | 9.7570       | 9.7445        | 9.7471     |
| <b>b(Å)</b>                    | 8.9348     | 8.9433        | 8.9509       | 8.9416        | 8.9381     |
| <b>c(Å)</b>                    | 5.3550     | 5.3468        | 5.3283       | 5.2946        | 5.2714     |
| <b>V(Å<sup>3</sup>)</b>        | 439.379    | 439.860       | 440.727      | 440.547       | 440.612    |
| <b><math>\alpha</math> (°)</b> | 90.000     | 90.000        | 90.000       | 90.000        | 90.000     |
| <b><math>\beta</math> (°)</b>  | 105.917    | 106.378       | 107.262      | 108.719       | 110.284    |
| <b><math>\gamma</math> (°)</b> | 90.000     | 90.000        | 90.000       | 90.000        | 90.000     |
| <b>R<sub>wp</sub>(%)</b>       | 7.69       | 6.55          | 8.64         | 9.76          | 8.47       |
| <b>R<sub>p</sub>(%)</b>        | 5.44       | 4.99          | 6.61         | 7.32          | 4.95       |
| <b><math>\chi^2</math></b>     | 2.51       | 1.75          | 2.16         | 3.26          | 2.93       |

Table S2. The calculated values of crystal field splitting parameter ( $Dq$ ) and Racah parameter ( $B$ )

|                             | <b>x=0</b> | <b>x=0.25</b> | <b>x=0.5</b> | <b>x=0.75</b> | <b>x=1</b> |
|-----------------------------|------------|---------------|--------------|---------------|------------|
| <b>Dq (cm<sup>-1</sup>)</b> | 1375       | 1355          | 1340         | 1329          | 1324       |
| <b>B (cm<sup>-1</sup>)</b>  | 886        | 854           | 845          | 842           | 831        |

The crystal field parameter ( $Dq$ ) and the Racah parameter ( $B$ ) are calculated from the following equations [2]:

$$\Delta E = E(^4A_{2g} \rightarrow ^4T_{1g}) - E(^4A_{2g} \rightarrow ^4T_{2g})$$

$$\Delta S = E(^4A_{2g} \rightarrow ^4T_{2g}) - E(^4T_{2g} \rightarrow ^4A_{2g})$$

$$10Dq = E(^4A_{2g} \rightarrow ^4T_{2g}) - \frac{\Delta S}{2}$$

$$\frac{Dq}{B} = \frac{15 \times \left( \frac{\Delta E}{Dq} - 8 \right)}{\left( \frac{\Delta E}{Dq} \right)^2 - \frac{10\Delta E}{Dq}}$$

where  $E(^4A_{2g} \rightarrow ^4T_{1g})$  and  $E(^4A_{2g} \rightarrow ^4T_{2g})$  are the energy values at the excitation peaks of the  $^4A_2 \rightarrow ^4T_1$  and  $^4A_2 \rightarrow ^4T_2$  transitions, respectively;  $E(^4T_{2g} \rightarrow ^4A_{2g})$  is the energy value at the emission peak of  $^4T_2 \rightarrow ^4A_2$  transition.

## References

- [1] Yao, L.; Shao, Q.; Shi, M.; Shang, T.; Dong, Y.; Liang, C.; He, J.; Jiang, J. Efficient ultra-broadband  $\text{Ga}_4\text{GeO}_8:\text{Cr}^{3+}$  phosphors with tunable peak wavelengths from 835 to 980 nm for NIR pc-LED application. *Adv. Opt. Mater.* 2022, 10, 2102229.
- [2] Yuan, C.; Li, R.; Liu, Y.; Zhang, L.; Zhang, J.; Leniec, G.; Sun, P.; Liu, Z.; Luo, Z.; Dong, R.; Jiang, J. Efficient and broadband  $\text{LiGaP}_2\text{O}_7:\text{Cr}^{3+}$  phosphors for smart near-infrared light-emitting diodes. *Laser Photonics Rev.* 2021, 15, 2100227.
